# Supplementary material
Source: PubMed Central journal article supplement (PMC6661894)
Supplement: NIHMS1527310-supplement-1.pdf [file NIHMS1527310-supplement-1.pdf]

**Appendix**  
**Accuracy of Self-Reported Height, Weight, and BMI Over Time in Emerging Adults**  
**Lipsky et al.**

**Appendix Table 1.** Timeline of Assessments Used in Analyses

| Wave | Year | NEXT main study              |                              | NEXT Plus additional assessments        |                 |
|------|------|------------------------------|------------------------------|-----------------------------------------|-----------------|
|      |      | Assessments                  | Number assessed <sup>a</sup> | Assessments <sup>b</sup>                | Number assessed |
| 1    | 2010 | Survey <sup>c</sup>          | 2,531                        | Cardiometabolic biomarkers <sup>d</sup> | 567             |
| 1    | 2010 | Anthropometrics <sup>e</sup> |                              |                                         |                 |
| 2    | 2011 | Survey                       | 2,448 <sup>f</sup>           | No additional                           | 534             |
| 2    | 2011 | Anthropometrics <sup>g</sup> |                              |                                         |                 |
| 3    | 2012 | Survey                       | 2,414                        | Anthropometrics                         | 509             |
| 4    | 2013 | –                            | –                            | Survey                                  | 461             |
| 4    | 2013 |                              |                              | Cardiometabolic biomarkers              |                 |
| 4    | 2013 |                              |                              | Anthropometrics                         |                 |
| 7    | 2016 | –                            | –                            | Survey                                  | 456             |
| 7    | 2016 |                              |                              | Cardiometabolic biomarkers              |                 |
| 7    | 2016 |                              |                              | Anthropometrics                         |                 |

<sup>a</sup>Loss to follow-up was primarily due to refusals without explanation or inability to recontact participants.

<sup>b</sup>NEXT Plus participants completed main study components as well as additional assessments.

<sup>c</sup>The annual survey queried height and weight, smoking, and alcohol use. At baseline, participants reported sex and race/ethnicity.

<sup>d</sup>Biomarkers included blood pressure and blood draw to assess fasting blood glucose, HbA1c, serum c-reactive protein, triglycerides, total cholesterol, high-density lipoprotein cholesterol, low-density lipoprotein cholesterol, and uric acid.

<sup>e</sup>Anthropometrics were obtained by trained and certified researchers using standardized protocols.

<sup>f</sup>Includes 254 participants who were first assessed in Wave 2. Total sample size for NEXT=2,785 (2,531 + 254).

<sup>g</sup>Anthropometrics were assessed in participants (both in the main study and substudy) attending NEXT Plus schools.

**Appendix**  
**Accuracy of Self-Reported Height, Weight, and BMI Over Time in Emerging Adults**  
**Lipsky et al.**

**Appendix Table 2.** Baseline Sample Characteristics in the NEXT Full Sample and the NEXT Plus Subsample

| <b>Characteristic</b>                   | <b>Full sample (n=2,785)</b> | <b>Subsample (n=567)</b> |
|-----------------------------------------|------------------------------|--------------------------|
| Age, mean (SD), years                   | 16.3 (0.5)                   | 16.5 (0.5)               |
| Female, n (%)                           | 1,386 (54.4)                 | 309 (54.5)               |
| <b>Race/ethnicity, n (%)</b>            |                              |                          |
| Non-Hispanic white                      | 1,098 (57.9)                 | 254 (45.0)               |
| Non-Hispanic black                      | 485 (17.6)                   | 94 (16.6)                |
| Hispanic                                | 798 (19.6)                   | 191 (33.8)               |
| Other                                   | 134 (5.0)                    | 26 (4.6)                 |
| Measured height (SD), cm                | 167.2 (9.0)                  | 166.4 (9.0)              |
| Measured weight (SD), kg                | 69.6 (18.3)                  | 71.4 (18.7)              |
| Measured BMI (SD), kg/m <sup>2</sup>    | 24.8 (6.0)                   | 25.7 (5.9)               |
| <b>Weight status,<sup>a</sup> n (%)</b> |                              |                          |
| Underweight                             | 37 (1.4)                     | 0                        |
| Normal weight                           | 1,413 (59.5)                 | 289 (51.0)               |
| Overweight                              | 448 (18.5)                   | 129 (22.8)               |
| Obese                                   | 487 (20.6)                   | 149 (26.3)               |

<sup>a</sup>Baseline weight status according to cutoffs of Centers for Disease Control and Prevention age- and sex-specific BMI percentiles (underweight= <5; normal weight= ≥5, <85; overweight= ≥85, <95; obese= ≥95).

**Appendix**  
**Accuracy of Self-Reported Height, Weight, and BMI Over Time in Emerging Adults**  
**Lipsky et al.**

**Appendix Table 3.** Correlation and Concordance<sup>a</sup> Between Measured and Self-Reported Anthropometrics

| Wave                             | Height   |          |             | Weight   |          |             | BMI               |          |             |
|----------------------------------|----------|----------|-------------|----------|----------|-------------|-------------------|----------|-------------|
|                                  | <i>r</i> | $\rho_c$ | LOA         | <i>r</i> | $\rho_c$ | LOA         | <i>r</i>          | $\rho_c$ | LOA         |
| NEXT full sample <sup>b</sup>    |          |          |             |          |          |             |                   |          |             |
| Wave 1                           |          |          |             |          |          |             |                   |          |             |
| All data                         | 0.85     | 0.83     | -12.8, 10.0 | 0.94     | 0.94     | -10.2, 12.4 | 0.49 <sup>c</sup> | 0.43     | -14.9, 16.0 |
| No BIV <sup>d</sup>              | 0.94     | 0.93     | -8.0, 5.5   | 0.96     | 0.96     | -7.7, 10.1  | 0.93              | 0.92     | -2.9, 4.5   |
| Wave 2                           |          |          |             |          |          |             |                   |          |             |
| All data                         | 0.92     | 0.91     | -9.4, 6.5   | 0.93     | 0.93     | -11.9, 14.0 | 0.92              | 0.91     | -3.4, 5.0   |
| No BIV                           | 0.96     | 0.95     | -6.8, 4.1   | 0.96     | 0.95     | -8.9, 11.3  | 0.94              | 0.92     | -3.0, 4.6   |
| Wave 3                           |          |          |             |          |          |             |                   |          |             |
| All data                         | 0.94     | 0.92     | -8.7, 5.6   | 0.97     | 0.97     | -7.7, 9.6   | 0.94              | 0.93     | -3.0, 4.6   |
| No BIV                           | 0.96     | 0.95     | -6.9, 3.9   | 0.97     | 0.97     | -7.5, 9.3   | 0.95              | 0.94     | -2.8, 4.3   |
| NEXT Plus subsample <sup>e</sup> |          |          |             |          |          |             |                   |          |             |
| Wave 1                           |          |          |             |          |          |             |                   |          |             |
| All data                         | 0.89     | 0.87     | -10.9, 8.0  | 0.97     | 0.97     | -7.0, 9.7   | 0.92              | 0.91     | -3.5, 5.2   |
| No BIV                           | 0.94     | 0.93     | -8.0, 5.5   | 0.97     | 0.97     | -6.9, 9.7   | 0.94              | 0.92     | -3.0, 4.7   |
| Wave 2                           |          |          |             |          |          |             |                   |          |             |
| All data                         | 0.92     | 0.91     | -9.3, 6.7   | 0.97     | 0.97     | -7.7, 9.9   | 0.92              | 0.91     | -3.7, 5.2   |
| No BIV                           | 0.96     | 0.95     | -6.7, 4.1   | 0.97     | 0.97     | -7.8, 9.9   | 0.94              | 0.93     | -3.0, 4.6   |
| Wave 3                           |          |          |             |          |          |             |                   |          |             |
| All data                         | 0.94     | 0.92     | -9.1, 5.5   | 0.98     | 0.98     | -6.7, 8.3   | 0.96              | 0.95     | -2.3, 3.9   |
| No BIV                           | 0.97     | 0.96     | -6.4, 3.3   | 0.98     | 0.98     | -6.8, 8.3   | 0.96              | 0.95     | -2.2, 3.7   |
| Wave 4                           |          |          |             |          |          |             |                   |          |             |
| All data                         | 0.95     | 0.94     | -7.9, 5.2   | 0.97     | 0.97     | -8.6, 9.8   | 0.96              | 0.96     | -2.7, 3.9   |
| No BIV                           | 0.96     | 0.95     | -6.8, 4.3   | 0.97     | 0.97     | -8.6, 9.9   | 0.97              | 0.96     | -2.7, 3.7   |
| Wave 7                           |          |          |             |          |          |             |                   |          |             |
| All data                         | 0.97     | 0.96     | -6.3, 4.3   | 0.97     | 0.97     | -9.6, 11.7  | 0.95              | 0.94     | -3.5, 4.9   |
| No BIV                           | 0.97     | 0.96     | -6.3, 4.3   | 0.97     | 0.97     | -8.6, 10.4  | 0.96              | 0.96     | -3.0, 4.3   |

<sup>a</sup>Pearson's *r*, Lin's concordance coefficient  $\rho_c$ , and Bland-Altman 95% limits-of-agreement (LOA). Lin and Bland-Altman methods do not account for the complex survey design.

<sup>b</sup>n=2,785 in Wave 1.

<sup>c</sup>*p*-value=0.09; *p*-values for all other *r* and  $\rho_c$  are <0.001

<sup>d</sup>Excluding BIV

<sup>e</sup>n=567 in Wave 1.

BIV, biologically implausible values (for self-reported measures).

**Appendix**  
**Accuracy of Self-Reported Height, Weight, and BMI Over Time in Emerging Adults**  
**Lipsky et al.**

**Appendix Table 4.** Agreement<sup>a</sup> of Self-Reported Versus Measured Weight Status<sup>b</sup> and of Central Adiposity<sup>c</sup> Versus Self-Reported and Measured Obesity<sup>d</sup>

| <b>Comparison</b>                                     | <b>Agreement %<br/>(95% CI)</b> | <b>Gwet<br/>AC1</b> | <b>Probabilistic<br/>benchmark</b> |
|-------------------------------------------------------|---------------------------------|---------------------|------------------------------------|
| <b>Self-reported versus measured weight status</b>    |                                 |                     |                                    |
| 1                                                     | 94 (93, 96)                     | 0.90                | 0.80–1.00                          |
| 2                                                     | 95 (91, 98)                     | 0.91                | 0.80–1.00                          |
| 3                                                     | 95 (92, 98)                     | 0.91                | 0.80–1.00                          |
| 4                                                     | 94 (85, 100)                    | 0.90                | 0.80–1.00                          |
| 7                                                     | 95 (86, 100)                    | 0.90                | 0.80–1.00                          |
| <b>Central adiposity versus self-reported obesity</b> |                                 |                     |                                    |
| 1                                                     | 90 (88, 92)                     | 0.86                | 0.80–1.00                          |
| 2                                                     | 89 (86, 93)                     | 0.86                | 0.80–1.00                          |
| 3                                                     | 89 (86, 92)                     | 0.85                | 0.80–1.00                          |
| 4                                                     | 83 (75, 92)                     | 0.77                | 0.60–0.80                          |
| 7                                                     | 85 (76, 94)                     | 0.75                | 0.60–0.80                          |
| <b>Central adiposity versus measured obesity</b>      |                                 |                     |                                    |
| 1                                                     | 89 (88, 90)                     | 0.84                | 0.80–1.00                          |
| 2                                                     | 90 (88, 92)                     | 0.86                | 0.80–1.00                          |
| 3                                                     | 90 (88, 91)                     | 0.85                | 0.80–1.00                          |
| 4                                                     | 83 (79, 87)                     | 0.72                | 0.60–0.80                          |
| 7                                                     | 86 (82, 89)                     | 0.73                | 0.60–0.80                          |

<sup>a</sup>Percent agreement and 95% CI, Gwet AC1 (Gwet's agreement coefficient) and probabilistic benchmark inter-rater reliability. Estimates exclude biologically implausible self-reported values.

<sup>b</sup>Weight was classified according to Centers for Disease Control and Prevention age- and sex-specific BMI percentile cut-offs until age 20 years (underweight= <5; normal weight= ≥5, <85; overweight ≥85, <95; obese= ≥95). From age ≥20 years, underweight=BMI <18.5; normal weight=BMI ≥18.5, <25; overweight=BMI ≥25, <30; obese=BMI ≥30.

<sup>c</sup>Central adiposity determined by measured waist circumference cutoffs (>102 cm for males; >88 cm for females).

<sup>d</sup>BMI ≥30 kg/m<sup>2</sup>.

**Appendix**  
**Accuracy of Self-Reported Height, Weight, and BMI Over Time in Emerging Adults**  
Lipsky et al.

**Appendix Table 5.** Associations<sup>a</sup> of Cardiometabolic Biomarkers With Self-Reported BMI, Measured BMI, and Measured Waist Circumference

| Wave                                       | Measured BMI, kg/m <sup>2</sup> |                 | Self-reported BMI, kg/m <sup>2</sup> |                 | Waist circumference, cm |                 |
|--------------------------------------------|---------------------------------|-----------------|--------------------------------------|-----------------|-------------------------|-----------------|
|                                            | $\beta$ (SE)                    | <i>p</i> -value | $\beta$ (SE)                         | <i>P</i> -value | $\beta$ (SE)            | <i>p</i> -value |
| <b>CRP, nmol/L<sup>2</sup></b>             |                                 |                 |                                      |                 |                         |                 |
| 1                                          | 0.12 (0.01)                     | <0.001          | 0.11 (0.01)                          | <0.001          | 0.05 (0.004)            | <0.001          |
| 4                                          | 0.14 (0.01)                     | <0.001          | 0.14 (0.01)                          | <0.001          | 0.06 (0.005)            | <0.001          |
| 7                                          | 0.11 (0.009)                    | <0.001          | 0.11 (0.01)                          | <0.001          | 0.05 (0.004)            | <0.001          |
| <b>Triglycerides, mmol/L<sup>2</sup></b>   |                                 |                 |                                      |                 |                         |                 |
| 1                                          | 0.02 (0.003)                    | <0.001          | 0.02 (0.004)                         | <0.001          | 0.009 (0.001)           | <0.001          |
| 4                                          | 0.02 (0.003)                    | <0.001          | 0.02 (0.004)                         | <0.001          | 0.009 (0.001)           | <0.001          |
| 7                                          | 0.02 (0.004)                    | <0.001          | 0.02 (0.004)                         | <0.001          | 0.008 (0.001)           | <0.001          |
| <b>HbA1c, mmol/mol<sup>2</sup></b>         |                                 |                 |                                      |                 |                         |                 |
| 1                                          | 0.003 (0.0009)                  | 0.002           | 0.002 (0.001)                        | 0.08            | 0.001 (0.0004)          | 0.002           |
| 4                                          | 0.003 (0.0009)                  | 0.001           | 0.003 (0.001)                        | 0.008           | 0.0009 (0.0004)         | 0.02            |
| 7                                          | 0.004 (0.0009)                  | <0.001          | 0.004 (0.001)                        | <0.001          | 0.002 (0.0004)          | <0.001          |
| <b>Fasting glucose, mmol/L<sup>2</sup></b> |                                 |                 |                                      |                 |                         |                 |
| 1                                          | 2.8E-5 (0.0009)                 | 0.98            | 6.6E-5 (0.001)                       | 0.96            | -4.3 E-5 (0.0004)       | 0.91            |
| 4                                          | 8.4E-4 (0.0009)                 | 0.34            | 2.7E-4 (0.001)                       | 0.79            | -1.0 E-4 (0.0004)       | 0.79            |
| 7                                          | 0.002 (0.0009)                  | 0.02            | 0.002 (0.001)                        | 0.07            | 6.7 E-4 (0.0004)        | 0.07            |
| <b>Total cholesterol, mmol/L</b>           |                                 |                 |                                      |                 |                         |                 |
| 1                                          | 0.03 (0.006)                    | <0.001          | 0.03 (0.007)                         | <0.001          | 0.01 (0.002)            | <0.001          |
| 4                                          | 0.02 (0.006)                    | 0.008           | 0.02 (0.007)                         | 0.001           | 0.007 (0.003)           | 0.008           |
| 7                                          | 0.02 (0.006)                    | 0.003           | 0.02 (0.007)                         | 0.001           | 0.009 (0.003)           | 0.001           |
| <b>HDL-C, mmol/L</b>                       |                                 |                 |                                      |                 |                         |                 |
| 1                                          | -0.01 (0.002)                   | <0.001          | -0.01 (0.003)                        | <0.001          | -0.006 (0.0009)         | <0.001          |
| 4                                          | -0.02 (0.002)                   | <0.001          | -0.02 (0.003)                        | <0.001          | -0.008 (0.001)          | <0.001          |
| 7                                          | -0.02 (0.002)                   | <0.001          | -0.02 (0.003)                        | <0.001          | -0.009 (0.001)          | <0.001          |
| <b>LDL-C, mmol/L</b>                       |                                 |                 |                                      |                 |                         |                 |
| 1                                          | 0.03 (0.005)                    | <0.001          | 0.03 (0.006)                         | <0.001          | 0.01 (0.002)            | <0.001          |
| 4                                          | 0.02 (0.005)                    | <0.001          | 0.03 (0.006)                         | <0.001          | 0.01 (0.002)            | <0.001          |
| 7                                          | 0.03 (0.005)                    | <0.001          | 0.03 (0.006)                         | <0.001          | 0.01 (0.002)            | <0.001          |
| <b>Uric acid, <math>\mu</math>mol/L</b>    |                                 |                 |                                      |                 |                         |                 |

**Appendix**  
**Accuracy of Self-Reported Height, Weight, and BMI Over Time in Emerging Adults**  
**Lipsky et al.**

|                           |              |        |             |        |              |        |
|---------------------------|--------------|--------|-------------|--------|--------------|--------|
| 1                         | 4.15 (0.44)  | <0.001 | 4.56 (0.60) | <0.001 | 1.61 (0.18)  | <0.001 |
| 4                         | 4.07 (0.45)  | <0.001 | 3.82 (0.54) | <0.001 | 1.91 (0.19)  | <0.001 |
| 7                         | 3.80 (0.48)  | <0.001 | 4.69 (0.53) | <0.001 | 1.87 (0.20)  | <0.001 |
| <b>Systolic BP, mmHg</b>  |              |        |             |        |              |        |
| 1                         | 0.06 (0.07)  | 0.38   | 0.09 (0.09) | 0.30   | 0.005 (0.03) | 0.84   |
| 4                         | 0.04 (0.007) | 0.60   | 0.07 (0.08) | 0.40   | 0.004 (0.03) | 0.91   |
| 7                         | 0.10 (0.08)  | 0.22   | 0.09 (0.09) | 0.29   | 0.05 (0.03)  | 0.15   |
| <b>Diastolic BP, mmHg</b> |              |        |             |        |              |        |
| 1                         | 0.28 (0.06)  | <0.001 | 0.22 (0.08) | 0.007  | 0.10 (0.02)  | <0.001 |
| 4                         | 0.35 (0.06)  | <0.001 | 0.34 (0.07) | <0.001 | 0.15 (0.03)  | <0.001 |
| 7                         | 0.40 (0.07)  | <0.001 | 0.40 (0.08) | <0.001 | 0.18 (0.03)  | <0.001 |

<sup>a</sup>Estimates from linear regression models adjusted for height, age, sex, race/ethnicity, smoking and alcohol use. Estimates exclude biologically implausible self-reported values. Sample includes NEXT Plus participants (n=567 in Wave 1).

<sup>b</sup>Indicates continuous outcomes were transformed using the natural logarithmic function.

BP, blood pressure; CRP, c-reactive protein; HDL, high-density lipoprotein cholesterol; LDL, low-density lipoprotein cholesterol.
